# Supplementary material for: Genome-wide signatures of complex introgression and adaptive evolution in the big cats
Source: PubMed Central journal article supplement — Sci Adv. 2017 Jul 19;3(7):e1700299. doi: 10.1126/sciadv.1700299 (PMC5517113; doi:10.1126/sciadv.1700299), 2017-07-19
Supplement: 1700299_SM.pdf [file 1700299_SM.pdf]

## Supplementary Materials for **Genome-wide signatures of complex introgression and adaptive evolution in the big cats**

Henrique V. Figueiró, Gang Li, Fernanda J. Trindade, Juliana Assis, Fabiano Pais, Gabriel Fernandes, Sarah H. D. Santos, Graham M. Hughes, Aleksey Komissarov, Agostinho Antunes, Cristine S. Trinca, Maíra R. Rodrigues, Tyler Linderoth, Ke Bi, Leandro Silveira, Fernando C. C. Azevedo, Daniel Kantek, Emiliano Ramalho, Ricardo A. Brassaloti, Priscilla M. S. Villela, Adauto L. V. Nunes, Rodrigo H. F. Teixeira, Ronaldo G. Morato, Damian Loska, Patricia Saragüeta, Toni Gabaldón, Emma C. Teeling, Stephen J. O'Brien, Rasmus Nielsen, Luiz L. Coutinho, Guilherme Oliveira, William J. Murphy, Eduardo Eizirik

Published 19 July 2017, *Sci. Adv.* **3**, e1700299 (2017)

DOI: 10.1126/sciadv.1700299

### The PDF file includes:

- fig. S1. Assessment of the effect of genealogical discordance on branch-site tests of positive selection.
- fig. S2. Assessment of divergence between domestic cat and *Panthera* species in windows containing genes with signatures of interspecies introgression and positive selection.
- fig. S3. Maximum-likelihood phylogeny constructed with a supermatrix consisting of 2151 concatenated single-copy orthologs for 11 mammals, derived from our phylome analysis.
- fig. S4. Enrichment analysis for the site model test.
- table S1. DNA sequencing information for the reference jaguar individual.
- table S2. Jaguar genome assembly quality metrics.
- table S3. Annotated protein-coding genes.
- table S4. Summary of the jaguar transcriptome sequencing results.
- table S5. DNA sequencing information for the leopard genome.
- table S6. Tree topology frequencies in window- and gene-based analyses.
- table S7. Tree topology frequencies for 3732 genes and their introns.
- table S8. Detailed results of the ABBA/BABA tests.
- table S9. Branch-site results for the jaguar.
- table S10. Branch-site results for the lion.
- table S11. Branch-site results for the snow leopard.

- table S14. Results of coalescent simulations based on jaguar exome data.
- table S15. Summary of repeat annotation for the jaguar genome.
- table S16. Tandem repeat annotation for the jaguar genome.
- table S17. Forty largest microsatellite families in the jaguar genome.
- table S18. Statistics on noncoding RNA annotation in the jaguar genome.
- table S20. Previously reported genomic resources used in our multispecies analyses.
- table S21. Consensus genome information (using the tiger assembly as a reference).
- table S27. Detailed information on the samples used in the exome capture experiment.
- table S28. Enrichment results for the jaguar branch-site test.
- table S29. Enrichment results for the lion branch-site test.

**Other Supplementary Material for this manuscript includes the following:**

(available at [advances.sciencemag.org/cgi/content/full/3/7/e1700299/DC1](http://advances.sciencemag.org/cgi/content/full/3/7/e1700299/DC1))

- table S12 (Microsoft Excel format). Branch-site results for the tiger.
- table S13 (Microsoft Excel format). Site model results.
- table S19 (Microsoft Excel format). Annotation of nuclear insertions of mitochondrial DNA (NUMTS) in the jaguar genome.
- table S22 (Microsoft Excel format). Outlier window test results.
- table S23 (Microsoft Excel format). Outlier Window KEGG enrichment results.
- table S24 (Microsoft Excel format). Outlier Window Pathway Commons enrichment results.
- table S25 (Microsoft Excel format). Outlier Window Phenotype enrichment results.
- table S26 (Microsoft Excel format). Outlier Window Disease enrichment results.
- table S30 (Microsoft Excel format). Tiger Pathway Commons enrichment results.
- table S31 (Microsoft Excel format). Tiger KEGG enrichment results.
- table S32 (Microsoft Excel format). Tiger Disease enrichment results.
- table S33 (Microsoft Excel format). Site model Pathway Commons enrichment results.
- table S34 (Microsoft Excel format). Site model KEGG enrichment results.
- table S35 (Microsoft Excel format). Site model Disease enrichment results.
- table S36 (Microsoft Excel format). Site model Biological Process enrichment results.
- table S37 (Microsoft Excel format). Site model Molecular Function enrichment results.

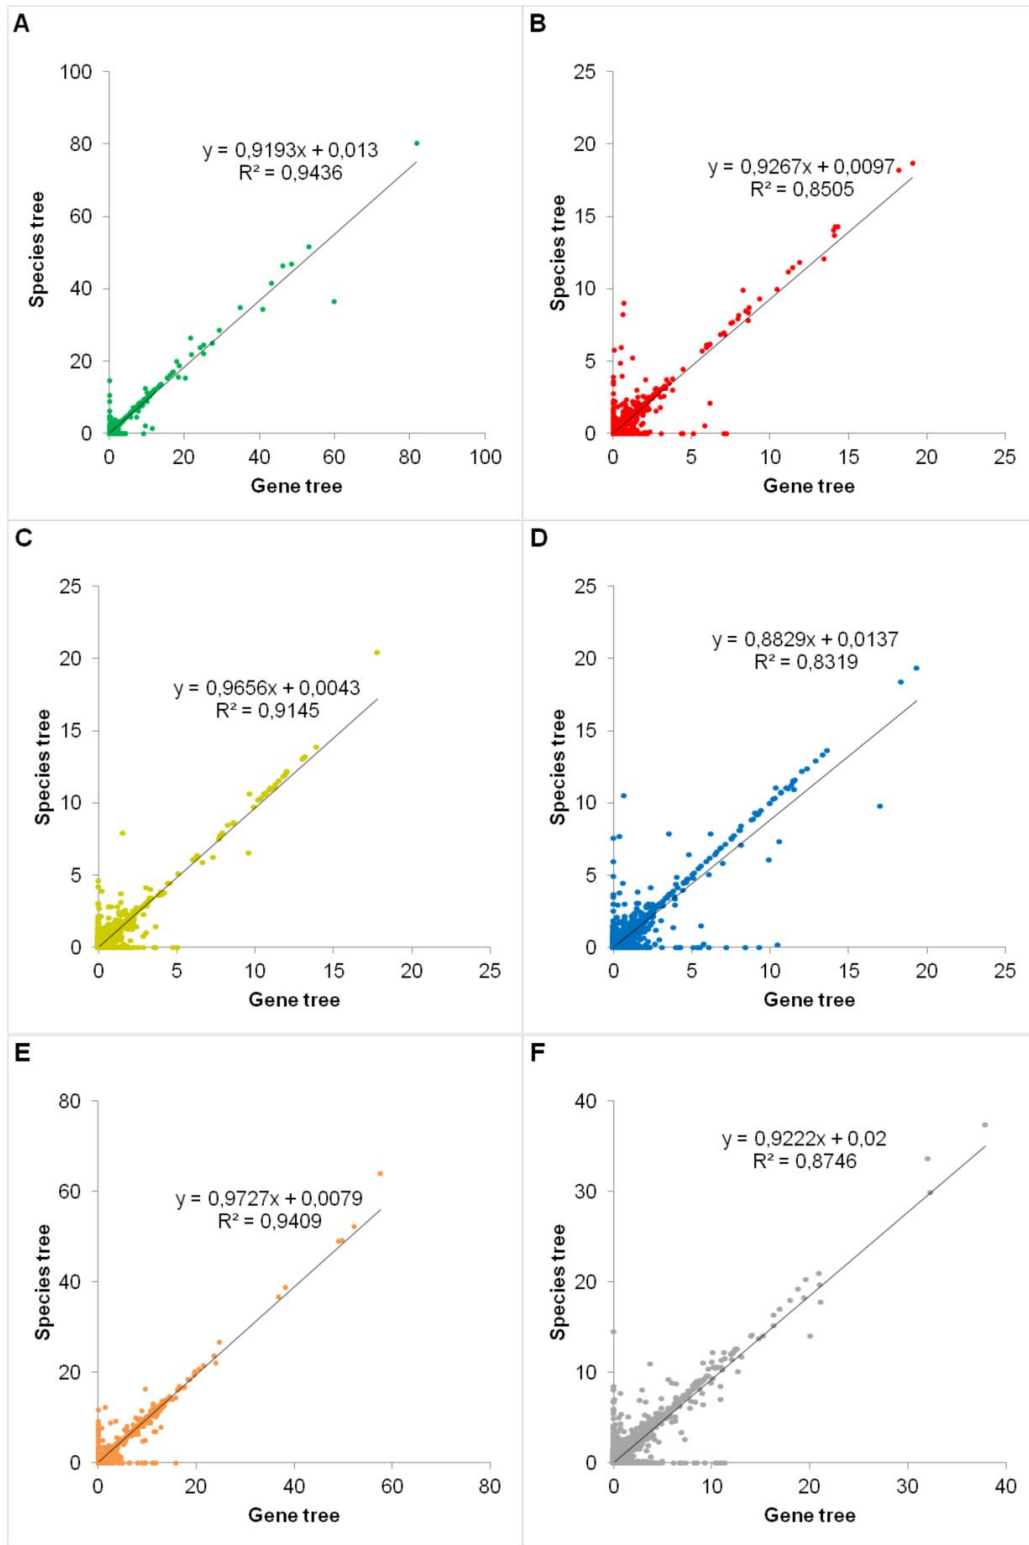

**fig. S1. Assessment of the effect of genealogical discordance on branch-site tests of positive selection.** Graphs depict the correlation between the calculated values ( $2 \cdot \Delta$ ) for the branch-site likelihood ratio tests (LRTs) performed with the species tree and the equivalent values estimated with the gene tree (reconstructed for each locus – see Methods for details). (A) jaguar; (B) lion; (C) leopard; (D) snow leopard; (E) tiger; (F) domestic cat vs. *Panthera*.

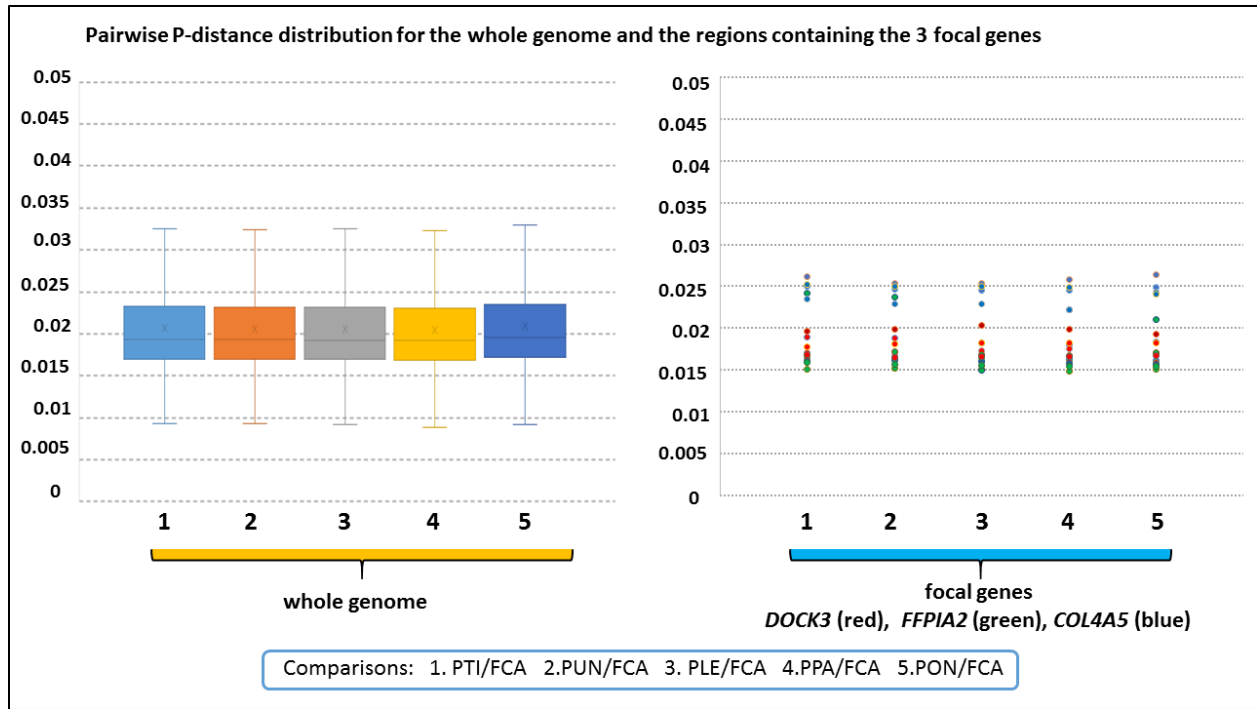

**fig. S2. Assessment of divergence between domestic cat and *Panthera* species in windows containing genes with signatures of interspecies introgression and positive selection.** The genome wide p-distance (estimated in non-overlapping 100 kb windows) between each *Panthera* species and the domestic cat is shown in the left panel: boxes range from the upper bound of quartile 1 (Q1) to the upper bound of quartile 3 (Q3); the line inside each box is the median; whisker lines represent the full range of the data). The right panel shows p-distances for the same taxon comparisons, with each dot representing a single non-overlapping 100 kb window containing one of the three focal genes [*DOCK3* (red), *PPFIA2* (green) and *COL4A5* (blue)].

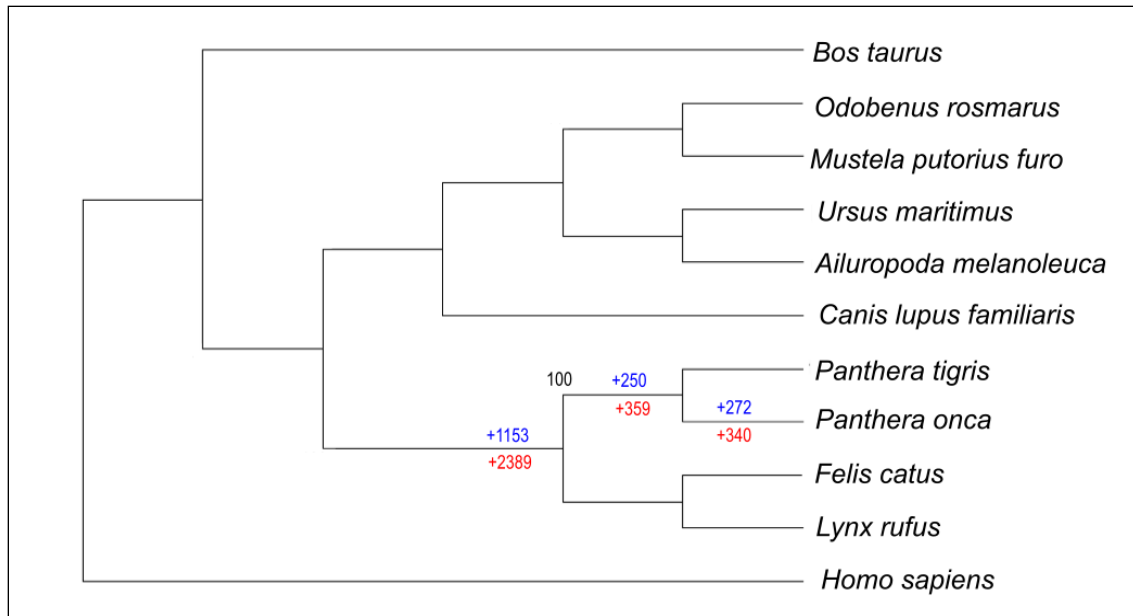

**fig. S3. Maximum-likelihood phylogeny constructed with a supermatrix consisting of 2151 concatenated single-copy orthologs for 11 mammals, derived from our phylome analysis.** All nodes were supported by 100% bootstrap values. For three felid branches (leading to the base of Felidae, the base of *Panthera*, and the jaguar lineage), values above branches (in blue) indicate the number of identified duplication events, and values below branches (in red) indicate the resulting number of novel genes.

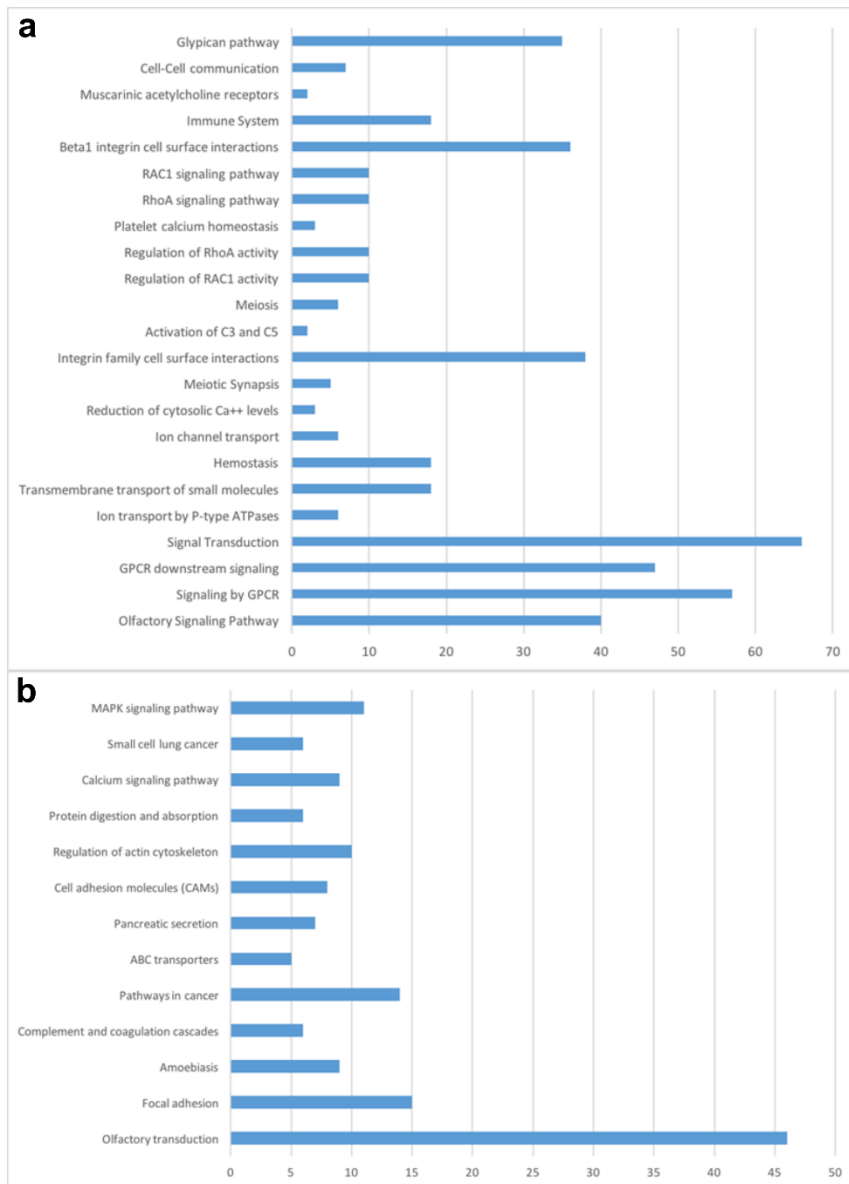

**fig. S4. Enrichment analysis for the site model test. (a)** Results against the Pathway Commons database; **(b)** Results against the KEGG database.

**table S1. DNA sequencing information for the reference jaguar individual.** Sequenced libraries with number of reads, insert size, sequence length and GC content information.

| Species | Number of reads | Direction | Insert Size | Seq Length | % GC |
|---------|-----------------|-----------|-------------|------------|------|
| Jaguar  | 908,465,441     | R1        | 180bp       | 101        | 44   |
| Jaguar  | 908,465,441     | R2        | 180bp       | 101        | 41   |
| Jaguar  | 211,010,191     | R1        | 3kb         | 101        | 41   |
| Jaguar  | 211,010,191     | R2        | 3kb         | 101        | 41   |
| Jaguar  | 183,752,503     | R1        | 8kb         | 101        | 40   |
| Jaguar  | 183,752,503     | R2        | 8kb         | 101        | 40   |
| Total   | 2,606,456,270   |           |             |            |      |

**table S2. Jaguar genome assembly quality metrics.**

| Metric            | Contigs       | Scaffolds     |
|-------------------|---------------|---------------|
| CEGMA partial     | 86.29%        | 93.15%        |
| CEGMA full        | 49.60%        | 56.05%        |
| #contigs          | 158329        | 7521          |
| #contigs >1kb     | 156436        | 7442          |
| Total length      | 2,284,631,488 | 2,405,344,986 |
| Total length >1kb | 2,282,949,125 | 2,405,268,288 |
| Largest contig    | 338,209       | 8,985,697     |
| GC (%)            | 41.51         | 41.51%        |
| N50               | 28.53 kb      | 1.52 Mb       |
| L50               | 23,26         | 474           |
| %gaps             | 0%            | 5%            |

**table S3. Annotated protein-coding genes.**

| Feature          | Number     |
|------------------|------------|
| Base pairs       | 32,384,308 |
| N50              | 1,827      |
| Longest gene     | 26,310     |
| Median gene size | 927        |
| % genes > 100 b  | 99.56%     |
| % genes > 200 b  | 97.27%     |
| % genes > 500 b  | 73.65%     |
| % genes > 1 kb   | 46.56%     |

**table S4. Summary of the jaguar transcriptome sequencing results.** Sequenced tissues used for the transcriptome analysis and annotation. Number of reads, insert size, sequence length and GC content for each library.

| Tissue   | Library ID    | Direction | Number of Reads | Insert Size | Seq Length | % GC |
|----------|---------------|-----------|-----------------|-------------|------------|------|
| Gum      | Gum_1_R1      | R1        | 26672756        | 180bp       | 101        | 49   |
| Gum      | Gum_1_R2      | R2        | 26672756        | 180bp       | 101        | 49   |
| Tongue   | Tongue_1_R1   | R1        | 20298080        | 180bp       | 101        | 50   |
| Tongue   | Tongue_1_R2   | R2        | 20298080        | 180bp       | 101        | 50   |
| Testicle | Testicle_1_R1 | R1        | 26912880        | 180bp       | 101        | 50   |
| Testicle | Testicle_1_R2 | R2        | 26912880        | 180bp       | 101        | 50   |
| Skin     | Skin1_R1      | R1        | 24363734        | 180bp       | 101        | 49   |
| Skin     | Skin_1_R2     | R2        | 24363734        | 180bp       | 101        | 49   |
| Skin     | Skin_2_R1     | R1        | 1473959         | 180bp       | 50         | 52   |
| Skin     | Skin_3_R1     | R1        | 4000000         | 180bp       | 50         | 51   |
| Skin     | Skin_4_R1     | R1        | 899518          | 180bp       | 50         | 51   |
| Skin     | Skin_5_R1     | R1        | 4000000         | 180bp       | 50         | 52   |
| Skin     | Skin_6_R1     | R1        | 1942875         | 180bp       | 50         | 52   |
| Skin     | Skin_7_R1     | R1        | 2422274         | 180bp       | 50         | 51   |
| Blood    | Blood_1_R1    | R1        | 4000000         | 180bp       | 50         | 52   |
| Blood    | Blood_2_R1    | R1        | 1805834         | 180bp       | 50         | 52   |
| Muscle   | Muscle_1_R1   | R1        | 1807474         | 180bp       | 50         | 51   |

**table S5. DNA sequencing information for the leopard genome.** Sequenced libraries with number of reads, direction, insert size, sequenced length and GC content information.

| Species | Number of reads | Direction | Insert Size | Seq Length | % GC |
|---------|-----------------|-----------|-------------|------------|------|
| Leopard | 94016735        | R1        | 180bp       | 20-125     | 41   |
| Leopard | 94016735        | R2        | 180bp       | 20-125     | 41   |
| Total   | 188033470       |           |             |            |      |



**table S6. Tree topology frequencies in window- and gene-based analyses.**

| Tree | Topology                           | % Windows | % Windows post-AU | % Genes   | % Genes post-AU |
|------|------------------------------------|-----------|-------------------|-----------|-----------------|
| 1    | (FCA,(((PLE,PPA),PON),(PTI,PUN))); | 63.362    | 81.992            | 23.390    | 57.421          |
| 2    | (FCA,(((PLE,PON),PPA),(PTI,PUN))); | 10.706    | 5.345             | 3.893     | 1.549           |
| 3    | (FCA,((PLE,(PON,PPA)),(PTI,PUN))); | 5.553     | 2.705             | 2.861     | 1.028           |
| 4    | (FCA,(((PLE,PPA),PON),PTI),PUN));  | 3.642     | 1.171             | 3.080     | 0.954           |
| 5    | (FCA,(((PLE,PPA),PON),PUN),PTI));  | 2.93      | 0.895             | 15.904    | 11.905          |
| 6    | (FCA,((PLE,PPA),(PON,(PTI,PUN)))); | 2.697     | 0.684             | 2.633     | 0.683           |
| 7    | (FCA,(((PLE,PON),PPA),PTI),PUN));  | 1.103     | 0.754             | 0.989     | 0.235           |
| 8    | (FCA,(((PLE,PON),PPA),PUN),PTI));  | 0.975     | 0.627             | 3.876     | 2.628           |
| 9    | (FCA,(((PLE,PPA),(PTI,PUN)),PON)); | 0.949     | 0.232             | 1.996     | 0.470           |
| 10   | (FCA,((PLE,PON),(PPA,(PTI,PUN)))); | 0.707     | 0.557             | 0.641     | 0.286           |
| 11   | (FCA,(((PLE,(PON,PPA)),PTI),PUN)); | 0.663     | 0.43              | 0.761     | 0.242           |
| 12   | (FCA,(((PLE,PON),(PTI,PUN)),PPA)); | 0.633     | 0.526             | 0.619     | 0.294           |
| 13   | (FCA,(((PLE,PPA),(PON,PTI)),PUN)); | 0.633     | 0.329             | 2.930     | 1.901           |
| 14   | (FCA,(((PLE,(PON,PPA)),PUN),PTI)); | 0.58      | 0.346             | 2.629     | 1.813           |
| 15   | (FCA,((PLE,(PTI,PUN)),(PON,PPA))); | 0.422     | 0.364             | 0.5377501 | 0.234879624     |
| 16   | (FCA,(PUN,(PTI,PON)),(PLE,PPA));   | 0.409     | 0.241             | 0         | 0               |
| 17   | (FCA,(PTI,PON),(PUN,(PLE,PPA)));   | 0.404     | 0.197             | 0         | 0               |
| 18   | (FCA,((PTI,(PLE,PPA)),(PON,PUN))); | 0.343     | 0.219             | 0         | 0               |
| 19   | (FCA,(((PLE,PPA),(PON,PUN)),PTI)); | 0.259     | 0.153             | 1.1056141 | 0.616559014     |
| 20   | (FCA,(PTI,PPA),(PUN,(PON,PLE)));   | 0.246     | 0.193             | 0         | 0               |
| 21   | (FCA,(PLE,((PON,PPA),(PTI,PUN)))); | 0.22      | 0.145             | 0.460314  | 0.146799765     |
| 22   | (FCA,((PLE,PPA),(PON,PUN),PTI));   | 0.202     | 0.132             | 0.555     | 0.176           |
| 23   | (FCA,(((PLE,PON),PUN),PTI),PPA));  | 0.171     | 0.158             | 0.185     | 0.081           |
| 24   | (FCA,(((PLE,PPA),PTI),PON),PUN));  | 0.136     | 0.088             | 0.314     | 0.081           |
| 25   | (FCA,(((PLE,PON),PUN),PPA),PTI));  | 0.132     | 0.123             | 0.452     | 0.374           |
| 26   | (FCA,(((PLE,PPA),PUN),PON),PTI));  | 0.114     | 0.057             | 4.427     | 3.743           |
| 27   | (FCA,((PLE,PON),(PPA,PTI)),PUN));  | 0.114     | 0.088             | 0.172     | 0.044           |
| 28   | (FCA,(((PLE,PON),PTI),(PPA,PUN))); | 0.114     | 0.101             | 0.202     | 0.059           |
| 29   | (FCA,(((PLE,PON),PTI),PPA),PUN));  | 0.083     | 0.07              | 0.228     | 0.044           |
| 30   | (FCA,((PLE,PUN),(PON,PPA),PTI));   | 0.079     | 0.053             | 0.215     | 0.132           |
| 31   | (FCA,(((PLE,PPA),PTI),PUN),PON));  | 0.075     | 0.048             | 0.396     | 0.095           |
| 32   | (FCA,((PLE,((PON,PTI),PPA)),PUN)); | 0.075     | 0.053             | 0.275     | 0.132           |
| 33   | (FCA,(((PLE,PPA),PUN),PTI),PON));  | 0.066     | 0.044             | 0.912     | 0.382           |
| 34   | (FCA,(((PLE,PUN),(PON,PPA)),PTI)); | 0.066     | 0.048             | 0.559     | 0.308           |
| 35   | (FCA,((PLE,(PON,(PTI,PUN))),PPA)); | 0.062     | 0.031             | 0.224     | 0.066           |
| 36   | (FCA,(((PLE,PON),PTI),PUN),PPA));  | 0.057     | 0.057             | 0.155     | 0.051           |
| 37   | (FCA,((PLE,((PON,PPA),PTI)),PUN)); | 0.053     | 0.035             | 0.159     | 0.044           |
| 38   | (FCA,(((PLE,PON),(PPA,PUN)),PTI)); | 0.048     | 0.048             | 0.581     | 0.286           |
| 39   | (FCA,(((PLE,PTI),(PON,PPA)),PUN)); | 0.048     | 0.044             | 0.181     | 0.044           |
| 40   | (FCA,(((PLE,PUN),PTI),(PON,PPA))); | 0.035     | 0.031             | 0.237     | 0.103           |
| 41   | (FCA,((PLE,PON),(PPA,PUN),PTI));   | 0.035     | 0.031             | 0.267     | 0.073           |
| 42   | (FCA,((PLE,PUN),(PON,PTI),PPA));   | 0.035     | 0.026             | 0.262     | 0.125           |
| 43   | (FCA,((PLE,((PON,PPA),PUN)),PTI)); | 0.031     | 0.022             | 0.297     | 0.139           |
| 44   | (FCA,((PLE,PUN),(PON,(PPA,PTI)))); | 0.031     | 0.022             | 0.039     | 0.007           |

|    |                                     |       |       |       |       |
|----|-------------------------------------|-------|-------|-------|-------|
| 45 | (FCA,(PLE,(((PON,PPA),PTI),PUN)));  | 0.026 | 0.018 | 0.108 | 0.015 |
| 46 | (FCA,(PLE,(((PON,PPA),PUN),PTI)));  | 0.026 | 0.018 | 0.103 | 0.007 |
| 47 | (FCA,((((PLE,PUN),PON),PPA),PTI));  | 0.022 | 0.013 | 0.172 | 0.066 |
| 48 | (FCA,(((PLE,(PON,PTI)),PPA),PUN));  | 0.022 | 0.018 | 0.361 | 0.125 |
| 49 | (FCA,(((PLE,(PTI,PUN)),PON),PPA));  | 0.022 | 0.009 | 0.198 | 0.044 |
| 50 | (FCA,(((PLE,PTI),PPA),(PON,PUN)));  | 0.022 | 0.013 | 0.056 | 0.007 |
| 51 | (FCA,((PLE,(PON,(PPA,PTI))),PUN));  | 0.022 | 0.009 | 0.116 | 0.022 |
| 52 | (FCA,(PLE,((PON,(PTI,PUN)),PPA)));  | 0.022 | 0.004 | 0.267 | 0.037 |
| 53 | (FCA,((((PLE,PUN),PPA),PON),PTI));  | 0.018 | 0.013 | 0.503 | 0.257 |
| 54 | (FCA,(PLE,(PON,(PPA,(PTI,PUN)))));  | 0.018 | 0.009 | 0.142 | 0.022 |
| 55 | (FCA,((((PLE,PUN),PON),PTI),PPA));  | 0.013 | 0.013 | 0.065 | 0.015 |
| 56 | (FCA,(((PLE,(PPA,PTI)),PON),PUN));  | 0.013 | 0.009 | 0.090 | 0.015 |
| 57 | (FCA,(((PLE,PUN),PON),(PPA,PTI)));  | 0.013 | 0.009 | 0.026 | 0.015 |
| 58 | (FCA,(((PLE,PUN),PPA),(PON,PTI)));  | 0.013 | 0.013 | 0.533 | 0.330 |
| 59 | (FCA,((PLE,((PON,PTI),PUN)),PPA));  | 0.013 | 0.009 | 0.323 | 0.110 |
| 60 | (FCA,((PLE,((PON,PUN),PPA)),PTI));  | 0.013 | 0.009 | 0.211 | 0.051 |
| 61 | (FCA,((PLE,(PON,PUN)),(PPA,PTI)));  | 0.013 | 0.013 | 0.043 | 0.015 |
| 62 | (FCA,((PLE,(PPA,(PTI,PUN))),PON));  | 0.013 | 0.004 | 0.361 | 0.059 |
| 63 | (FCA,((PLE,(PPA,PUN)),(PON,PTI)));  | 0.013 | 0.013 | 0.546 | 0.272 |
| 64 | (FCA,((PLE,PTI),((PON,PUN),PPA)));  | 0.013 | 0.004 | 0.034 | 0.015 |
| 65 | (FCA,(PLE,(((PON,PTI),PPA),PUN)));  | 0.013 | 0.013 | 0.120 | 0.037 |
| 66 | (FCA,((((PLE,PTI),PPA),PUN),PON));  | 0.009 | 0.004 | 0.099 | 0.015 |
| 67 | (FCA,((((PLE,PTI),PUN),PON),PPA));  | 0.009 | 0.009 | 0.043 | 0.015 |
| 68 | (FCA,((((PLE,PUN),PTI),PON),PPA));  | 0.009 | 0.004 | 0.090 | 0.015 |
| 69 | (FCA,((((PLE,(PON,PUN)),PPA),PTI)); | 0.009 | 0     | 0.202 | 0.037 |
| 70 | (FCA,((((PLE,(PPA,PUN)),PON),PTI)); | 0.009 | 0.009 | 0.602 | 0.286 |
| 71 | (FCA,((((PLE,PUN),(PON,PTI)),PPA)); | 0.009 | 0.009 | 0.211 | 0.110 |
| 72 | (FCA,((((PLE,PUN),(PPA,PTI)),PON)); | 0.009 | 0.004 | 0.099 | 0.007 |
| 73 | (FCA,((PLE,(PON,(PPA,PUN))),PTI));  | 0.009 | 0.009 | 0.189 | 0.066 |
| 74 | (FCA,((PLE,(PON,PTI)),(PPA,PUN)));  | 0.009 | 0.009 | 0.189 | 0.103 |
| 75 | (FCA,(PLE,(((PON,PTI),PUN),PPA)));  | 0.009 | 0     | 0.301 | 0.088 |
| 76 | (FCA,((((PLE,PUN),PPA),PTI),PON));  | 0.004 | 0.004 | 0.163 | 0.044 |
| 77 | (FCA,((((PLE,PUN),PTI),PPA),PON));  | 0.004 | 0.004 | 0.133 | 0.015 |
| 78 | (FCA,(((PLE,(PON,PTI)),PUN),PPA));  | 0.004 | 0     | 0.176 | 0.081 |
| 79 | (FCA,(((PLE,(PON,PUN)),PTI),PPA));  | 0.004 | 0.004 | 0.073 | 0.007 |
| 80 | (FCA,(((PLE,(PPA,PTI)),PUN),PON));  | 0.004 | 0.004 | 0.116 | 0.022 |
| 81 | (FCA,(((PLE,PTI),PON),(PPA,PUN)));  | 0.004 | 0.004 | 0.047 | 0.022 |
| 82 | (FCA,((PLE,PTI),(PON,(PPA,PUN))));  | 0.004 | 0.004 | 0.047 | 0.015 |
| 83 | (FCA,(PLE,(((PON,PUN),PPA),PTI)));  | 0.004 | 0.004 | 0.039 | 0.007 |
| 84 | (FCA,(PLE,(((PON,PUN),PTI),PPA)));  | 0.004 | 0.004 | 0.116 | 0.022 |
| 85 | (FCA,(PLE,((PON,(PPA,PTI)),PUN)));  | 0.004 | 0.004 | 0.069 | 0.015 |
| 86 | (FCA,(PLE,((PON,PTI),(PPA,PUN))));  | 0.004 | 0.004 | 0.198 | 0.059 |
| 87 | (FCA,(PLE,((PON,PUN),(PPA,PTI))));  | 0.004 | 0     | 0.069 | 0.015 |

**table S7. Tree topology frequencies for 3732 genes and their introns.** The frequency of each observed topology (numbered as in table S6) is shown for a data set in which each gene is represented solely by its introns (i.e. CDs excluded), as well as for the full data set (Genes) comprising introns+exons.

| Tree | Topology                          | % Introns | % Introns post-AU | % Genes | % Genes post-AU |
|------|-----------------------------------|-----------|-------------------|---------|-----------------|
| 1    | (FCA,(((PLE,PPA),PON),(PTI,PUN))) | 33.69     | 99.57             | 33.69   | 99.57           |
| 2    | (FCA,(((PLE,PON),PPA),(PTI,PUN))) | 2.78      | 0                 | 2.78    | 0               |
| 3    | (FCA,((PLE,(PON,PPA)),(PTI,PUN))) | 2.18      | 0                 | 2.18    | 0               |
| 4    | (FCA,(((PLE,PPA),PON),PTI),PUN))  | 2.64      | 0.09              | 2.64    | 0.09            |
| 5    | (FCA,(((PLE,PPA),PON),PUN),PTI))  | 22.36     | 0.17              | 22.36   | 0.17            |
| 6    | (FCA,((PLE,PPA),(PON,(PTI,PUN)))) | 2.26      | 0.03              | 2.26    | 0.03            |
| 7    | (FCA,(((PLE,PON),PPA),PTI),PUN))  | 0.37      | 0                 | 0.37    | 0               |
| 8    | (FCA,(((PLE,PON),PPA),PUN),PTI))  | 3.1       | 0                 | 3.1     | 0               |
| 9    | (FCA,(((PLE,PPA),(PTI,PUN)),PON)) | 1.12      | 0.06              | 1.12    | 0.06            |
| 10   | (FCA,((PLE,PON),(PPA,(PTI,PUN)))) | 0.43      | 0                 | 0.43    | 0               |
| 11   | (FCA,(((PLE,(PON,PPA)),PTI),PUN)) | 0.17      | 0                 | 0.17    | 0               |
| 12   | (FCA,(((PLE,PON),(PTI,PUN)),PPA)) | 0.14      | 0                 | 0.14    | 0               |
| 13   | (FCA,(((PLE,PPA),(PON,PTI)),PUN)) | 2.58      | 0                 | 2.58    | 0               |
| 14   | (FCA,(((PLE,(PON,PPA)),PUN),PTI)) | 2.21      | 0                 | 2.21    | 0               |
| 15   | (FCA,((PLE,(PTI,PUN)),(PON,PPA))) | 0.32      | 0                 | 0.32    | 0               |
| 19   | (FCA,(((PLE,PPA),(PON,PUN)),PTI)) | 1.06      | 0                 | 1.06    | 0               |
| 21   | (FCA,(PLE,((PON,PPA),(PTI,PUN)))) | 0.23      | 0                 | 0.23    | 0               |
| 22   | (FCA,((PLE,PPA),(PON,PUN),PTI))   | 0.2       | 0                 | 0.2     | 0               |
| 23   | (FCA,(((PLE,PON),PUN),PTI),PPA))  | 0.03      | 0                 | 0.03    | 0               |
| 24   | (FCA,(((PLE,PPA),PTI),PON),PUN))  | 0.17      | 0                 | 0.17    | 0               |
| 25   | (FCA,(((PLE,PON),PUN),PPA),PTI))  | 0.37      | 0                 | 0.37    | 0               |
| 26   | (FCA,(((PLE,PPA),PUN),PON),PTI))  | 4.56      | 0                 | 4.56    | 0               |
| 27   | (FCA,(((PLE,PON),(PPA,PTI)),PUN)) | 0.03      | 0                 | 0.03    | 0               |
| 28   | (FCA,(((PLE,PON),PTI),(PPA,PUN))) | 0.06      | 0                 | 0.06    | 0               |
| 29   | (FCA,(((PLE,PON),PTI),PPA),PUN))  | 0.03      | 0                 | 0.03    | 0               |
| 30   | (FCA,((PLE,PUN),(PON,PPA),PTI))   | 0.2       | 0                 | 0.2     | 0               |
| 31   | (FCA,(((PLE,PPA),PTI),PUN),PON))  | 0.14      | 0                 | 0.14    | 0               |
| 32   | (FCA,((PLE,((PON,PTI),PPA)),PUN)) | 0.11      | 0                 | 0.11    | 0               |
| 33   | (FCA,(((PLE,PPA),PUN),PTI),PON))  | 0.69      | 0                 | 0.69    | 0               |
| 34   | (FCA,(((PLE,PUN),(PON,PPA)),PTI)) | 0.32      | 0                 | 0.32    | 0               |
| 35   | (FCA,((PLE,(PON,(PTI,PUN))),PPA)) | 0.17      | 0                 | 0.17    | 0               |
| 36   | (FCA,(((PLE,PON),PTI),PUN),PPA))  | 0.09      | 0                 | 0.09    | 0               |
| 38   | (FCA,(((PLE,PON),(PPA,PUN)),PTI)) | 0.37      | 0                 | 0.37    | 0               |
| 39   | (FCA,(((PLE,PTI),(PON,PPA)),PUN)) | 0.09      | 0                 | 0.09    | 0               |
| 40   | (FCA,(((PLE,PUN),PTI),(PON,PPA))) | 0.11      | 0                 | 0.11    | 0               |
| 41   | (FCA,((PLE,PON),(PPA,PUN),PTI))   | 0.06      | 0                 | 0.06    | 0               |
| 42   | (FCA,((PLE,PUN),(PON,PTI),PPA))   | 0.14      | 0                 | 0.14    | 0               |
| 43   | (FCA,((PLE,((PON,PPA),PUN)),PTI)) | 0.2       | 0                 | 0.2     | 0               |
| 45   | (FCA,(PLE,(((PON,PPA),PTI),PUN))) | 0.03      | 0                 | 0.03    | 0               |
| 47   | (FCA,(((PLE,PUN),PON),PPA),PTI))  | 0.09      | 0                 | 0.09    | 0               |
| 48   | (FCA,(((PLE,(PON,PTI)),PPA),PUN)) | 0.11      | 0                 | 0.11    | 0               |
| 49   | (FCA,(((PLE,(PTI,PUN)),PON),PPA)) | 0.17      | 0                 | 0.17    | 0               |
| 50   | (FCA,(((PLE,PTI),PPA),(PON,PUN))) | 0.03      | 0                 | 0.03    | 0               |
| 52   | (FCA,(PLE,((PON,(PTI,PUN)),PPA))) | 0.2       | 0                 | 0.2     | 0               |
| 53   | (FCA,(((PLE,PUN),PPA),PON),PTI))  | 0.37      | 0                 | 0.37    | 0               |
| 58   | (FCA,(((PLE,PUN),PPA),(PON,PTI))) | 0.37      | 0                 | 0.37    | 0               |
| 59   | (FCA,((PLE,((PON,PTI),PUN)),PPA)) | 0.23      | 0                 | 0.23    | 0               |
| 60   | (FCA,((PLE,((PON,PUN),PPA)),PTI)) | 0.03      | 0                 | 0.03    | 0               |

|    |                                   |      |      |      |      |
|----|-----------------------------------|------|------|------|------|
| 62 | (FCA,((PLE,(PPA,(PTI,PUN))),PON)) | 0.09 | 0.03 | 0.09 | 0.03 |
| 63 | (FCA,((PLE,(PPA,PUN)),(PON,PTI))) | 0.29 | 0    | 0.29 | 0    |
| 65 | (FCA,(PLE,(((PON,PTI),PPA),PUN))) | 0.03 | 0    | 0.03 | 0    |
| 66 | (FCA,(((PLE,PTI),PPA),PUN),PON))  | 0.03 | 0    | 0.03 | 0    |
| 69 | (FCA,(((PLE,(PON,PUN)),PPA),PTI)) | 0.03 | 0    | 0.03 | 0    |
| 70 | (FCA,(((PLE,(PPA,PUN)),PON),PTI)) | 0.23 | 0    | 0.23 | 0    |
| 71 | (FCA,(((PLE,PUN),(PON,PTI)),PPA)) | 0.09 | 0    | 0.09 | 0    |
| 73 | (FCA,((PLE,(PON,(PPA,PUN))),PTI)) | 0.11 | 0    | 0.11 | 0    |
| 74 | (FCA,((PLE,(PON,PTI)),(PPA,PUN))) | 0.11 | 0    | 0.11 | 0    |
| 75 | (FCA,(PLE,(((PON,PTI),PUN),PPA))) | 0.11 | 0    | 0.11 | 0    |
| 76 | (FCA,(((PLE,PUN),PPA),PTI),PON))  | 0.06 | 0    | 0.06 | 0    |
| 78 | (FCA,(((PLE,(PON,PTI)),PUN),PPA)) | 0.09 | 0    | 0.09 | 0    |
| 80 | (FCA,(((PLE,(PPA,PTI)),PUN),PON)) | 0.03 | 0    | 0.03 | 0    |
| 86 | (FCA,(PLE,((PON,PTI),(PPA,PUN)))) | 0.03 | 0    | 0.03 | 0    |

**table S8. Detailed results of the ABBA/BABA tests.**

| P1      | P2           | P3           | nABBA     | nBABA     | <i>D</i> | jackEst | s.e.   | <i>Z</i> | p-value   |
|---------|--------------|--------------|-----------|-----------|----------|---------|--------|----------|-----------|
| Lion    | Jaguar       | Snow leopard | 1,219,639 | 1,921,731 | -0.22    | -0.22   | 0.0043 | -52.5    | 0         |
| Leopard | Jaguar       | Snow leopard | 1,334,215 | 1,921,658 | -0.18    | -0.18   | 0.0042 | -43.3    | 0         |
| Leopard | lion         | Snow leopard | 1,079,821 | 963,890   | 0.06     | 0.06    | 0.0034 | 16.7     | 1.31E-62  |
| Lion    | Jaguar       | Tiger        | 1,328,409 | 1,887,613 | -0.17    | -0.17   | 0.0055 | -31.6    | 3.69E-219 |
| Leopard | Jaguar       | Tiger        | 1,430,119 | 1,887,678 | -0.14    | -0.14   | 0.0051 | -27.2    | 6.49E-163 |
| Leopard | Lion         | Tiger        | 1,077,955 | 978,765   | 0.05     | 0.05    | 0.0037 | 13.1     | 3.29E-39  |
| Tiger   | Snow leopard | Jaguar       | 1,165,436 | 1,483,318 | -0.12    | -0.12   | 0.0040 | -30.0    | 9.81E-198 |
| Tiger   | Snow leopard | Leopard      | 1,235,405 | 1,433,574 | -0.07    | -0.07   | 0.0028 | -26.8    | 3.23E-158 |
| Tiger   | Snow leopard | Lion         | 1,250,134 | 1,434,106 | -0.07    | -0.07   | 0.0026 | -26.0    | 4.95E-149 |
| Leopard | Lion         | Jaguar       | 1,311,090 | 1,169,855 | 0.06     | 0.06    | 0.0048 | 11.8     | 3.90E-32  |

**table S9. Branch-site results for the jaguar.** Candidate genes under positive selection, p-values for the gene tree and species tree analysis (significance threshold:  $\alpha < 0.05$ ) and gene description. Genes are ordered based on the p-values for the gene tree dataset.

| Gene                | P-value   |              | Description                                             |
|---------------------|-----------|--------------|---------------------------------------------------------|
|                     | Gene tree | Species tree |                                                         |
| <i>LOC102957369</i> | 3.22E-13  | 6.78E-13     | Uncharacterized protein cIorf167-like                   |
| <i>LOC102957355</i> | 3.52E-12  | 7.62E-12     | Olfactory receptor 3A1-like                             |
| <i>LOC102952669</i> | 1.05E-11  | 1.05E-11     | Repetin-like                                            |
| <i>LOC102968863</i> | 3.52E-09  | 3.52E-09     | 60S ribosomal protein L35-like                          |
| <i>SLC8A3</i>       | 4.12E-09  | 4.12E-09     | Sodium/calcium exchanger 3 isoform X1                   |
| <i>SSTR4</i>        | 6.59E-08  | 8.89E-08     | Somatostatin receptor type 4                            |
| <i>LOC102971194</i> | 1.65E-07  | 5.95E-07     | Zinc finger protein 135-like                            |
| <i>ESRP1</i>        | 5.31E-07  | 7.16E-07     | Epithelial splicing regulatory protein 1 isoform X1     |
| <i>LOC102950007</i> | 5.41E-07  | 2.49E-06     | Protein FAM47A-like                                     |
| <i>ZFP3</i>         | 2.98E-06  | 2.98E-06     | Zinc finger protein 3 homolog                           |
| <i>LOC102956118</i> | 3.29E-06  | 2.92E-07     | Mucin-16-like                                           |
| <i>LOC102955222</i> | 7.04E-06  | 8.59E-05     | Uncharacterized protein LOC102955222 isoform X1         |
| <i>CNTNAP1</i>      | 1.59E-05  | 1.47E-05     | Contactin-associated protein 1                          |
| <i>LOC102948925</i> | 1.79E-05  | 7.68E-05     | Olfactory receptor 10H1-like                            |
| <i>LOC102948654</i> | 2.38E-05  | 8.36E-06     | KH domain-containing protein 3-like                     |
| <i>AKAP13</i>       | 3.64E-05  | 3.64E-05     | A-kinase anchor protein 13-like                         |
| <i>ABTB2</i>        | 4.37E-05  | 4.37E-05     | Ankyrin repeat and BTB/POZ domain-containing protein 2  |
| <i>TPM3</i>         | 8.75E-05  | 8.75E-05     | Tropomyosin alpha-3 chain isoform X6                    |
| <i>PPP1R15A</i>     | 0.0001794 | 0.000179405  | Protein phosphatase 1 regulatory subunit 15A isoform X7 |
| <i>KDM3B</i>        | 0.0002056 | 0.000226917  | Lysine-specific demethylase 3B                          |
| <i>LOC102953722</i> | 0.0002392 | 0.000241142  | Uncharacterized protein LOC102953722                    |
| <i>GF11</i>         | 0.000315  | 0.000315011  | Zinc finger protein Gfi-1                               |
| <i>FOXJ2</i>        | 0.0004935 | 0.00049352   | Forkhead box protein J2                                 |
| <i>LOC102963291</i> | 5.30E-04  | 5.30E-04     | Melanoma-associated antigen B4-like isoform X1          |
| <i>CAPG</i>         | 6.19E-04  | 6.19E-04     | Macrophage-capping protein isoform X1                   |
| <i>BAHD1</i>        | 6.59E-04  | 7.22E-04     | Bromo adjacent homology domain-containing 1 protein     |
| <i>SLC26A3</i>      | 0.0006776 | 0.236785196  | Chloride anion exchanger                                |
| <i>LOC102964920</i> | 0.0007984 | 0.000798578  | Uncharacterized protein LOC102964920                    |
| <i>BIRC2</i>        | 8.06E-04  | 7.92E-04     | Baculoviral IAP repeat-containing protein 2             |
| <i>LOC102956679</i> | 0.0008665 | 0.000866455  | Olfactory receptor 2B6-like                             |
| <i>LOC102965607</i> | 0.0010403 | 0.001350757  | Cyclic AMP-dependent transcription factor ATF-5-like    |

**table S10. Branch-site results for the lion.** Candidate genes under positive selection, p-values for the gene tree and species tree analysis (significance threshold:  $\alpha < 0.05$ ) and gene description. Genes are ordered based on the p-values for the gene tree data set.

| Gene                | P-value   |              | Description                                     |
|---------------------|-----------|--------------|-------------------------------------------------|
|                     | Gene tree | Species tree |                                                 |
| <i>LOC102951325</i> | 3.36E-07  | 0.998871621  | Complement C3-like                              |
| <i>KRT40</i>        | 1.26E-05  | 1.55E-05     | Keratin, type I cytoskeletal 40                 |
| <i>ART3</i>         | 1.96E-05  | 1.00E+00     | Ecto-ADP-ribosyltransferase 3 isoform X2        |
| <i>KRT76</i>        | 2.00E-05  | 2.00E-05     | Keratin, type II cytoskeletal 2 oral isoform X2 |

**table S11. Branch-site results for the snow leopard.** Candidate genes under positive selection, p-values for the gene tree and species tree analysis (significance threshold:  $\alpha < 0.05$ ) and gene description. Genes are ordered based on the p-values for the gene tree data set. No statistically significant enrichment was observed in the Gene Ontology analysis.

| Gene                | P-value   |              | Description                          |
|---------------------|-----------|--------------|--------------------------------------|
|                     | Gene tree | Species tree |                                      |
| <i>IKBKG</i>        | 1.09E-05  | 1.09E-05     | NF-kappa-B essential modulator       |
| <i>LOC102958616</i> | 1.83E-05  | 1.83E-05     | Uncharacterized protein LOC102958616 |
| <i>UHRF1</i>        | 3.65E-05  | 0.001758798  | E3 ubiquitin-protein ligase UHRF1    |

**table S14. Results of coalescent simulations based on jaguar exome data.** focusing on the 25 captured genes with significant signatures of interspecies introgression (based on the outlier window test). *DOCK3* and *COL4A5* retained significance after Bonferroni correction for all four demographic/recombination scenarios.

| Gene           | Length (bp) | No. of SNPs | p-values for different demographic/recombination scenarios |                                  |                          |                                          |
|----------------|-------------|-------------|------------------------------------------------------------|----------------------------------|--------------------------|------------------------------------------|
|                |             |             | No recombination                                           | No recombination with bottleneck | Chromosome recombination | Chromosome recombination with bottleneck |
| <i>DOCK3</i>   | <b>6088</b> | <b>0</b>    | <b>0.0024</b>                                              | <b>0</b>                         | <b>0</b>                 | <b>0</b>                                 |
| <i>COL4A5</i>  | <b>5026</b> | <b>0</b>    | <b>0.0144</b>                                              | <b>0.0072</b>                    | <b>0.0072</b>            | <b>0.0096</b>                            |
| <i>PPFIA2</i>  | 3828        | 1           | 0.0648                                                     | 0.0576                           | 0.0744                   | 0.06                                     |
| <i>AMER1</i>   | 3447        | 0           | 0.096                                                      | 0.0792                           | 0.0528                   | 0.0912                                   |
| <i>COL4A6</i>  | 5836        | 2           | 0.1104                                                     | 0.0936                           | 0.0984                   | 0.0912                                   |
| <i>IRS4</i>    | 3004        | 0           | 0.1368                                                     | 0.144                            | 0.1248                   | 0.12                                     |
| <i>EXOC2</i>   | 3223        | 1           | 0.156                                                      | 0.1752                           | 0.1872                   | 0.192                                    |
| <i>AR</i>      | 2722        | 0           | 0.2136                                                     | 0.2136                           | 0.2184                   | 1.02                                     |
| <i>MID2</i>    | 2430        | 0           | 0.3192                                                     | 0.3744                           | 0.3504                   | 0.372                                    |
| <i>UBE3A</i>   | 3350        | 1           | 0.5568                                                     | 0.5832                           | 0.4848                   | 0.4896                                   |
| <i>NXF2</i>    | 1849        | 0           | 0.9144                                                     | 0.8904                           | 0.9408                   | 0.9864                                   |
| <i>PJAI</i>    | 2660        | 1           | 1.3008                                                     | 1.308                            | 1.164                    | 1.224                                    |
| <i>DACH2</i>   | 1558        | 0           | 1.4448                                                     | 1.428                            | 1.44                     | 1.4496                                   |
| <i>PLP1</i>    | 1355        | 0           | 2.1528                                                     | 2.052                            | 2.0376                   | 2.1936                                   |
| <i>CNGA2</i>   | 2003        | 1           | 2.964                                                      | 3.2016                           | 3.0288                   | 3.0216                                   |
| <i>SH3BGRL</i> | 1041        | 0           | 3.5616                                                     | 3.5568                           | 3.4632                   | 3.4704                                   |
| <i>ASB12</i>   | 1469        | 1           | 5.7984                                                     | 5.8224                           | 5.6568                   | 5.9016                                   |
| <i>HMGN5</i>   | 675         | 0           | 7.1112                                                     | 6.7656                           | 7.0368                   | 7.0224                                   |
| <i>RAB9B</i>   | 1204        | 1           | 8.2704                                                     | 7.944                            | 8.1192                   | 8.28                                     |
| <i>POU3F4</i>  | 1201        | 1           | 8.3016                                                     | 8.2848                           | 8.3328                   | 8.1504                                   |
| <i>MC2R</i>    | 895         | 1           | 8.6568                                                     | 8.616                            | 8.6904                   | 8.8152                                   |
| <i>FATE1</i>   | 1063        | 1           | 9.588                                                      | 9.6168                           | 9.4944                   | 9.2664                                   |
| <i>SULT1C4</i> | 1041        | 1           | 10.0104                                                    | 9.8448                           | 9.8184                   | 10.0224                                  |
| <i>BEX5</i>    | 377         | 5           | 24                                                         | 23.9832                          | 23.9928                  | 23.9808                                  |

**table S15. Summary of repeat annotation for the jaguar genome.**

| Tool         | Repeat type            | Contigs | Scaffolds |
|--------------|------------------------|---------|-----------|
| WindowMasker | Any repeated fragments | 31.23%  | 29.66%    |
| TRF          | Tandem repeats         | 2.10%   | 2.12%     |
| DUST         | Simple sequence        | 6.50%   | 11.20%    |
| RepeatMasker | Known repeats          | 38.63%  | 37.48%    |
|              | SINEs                  | 10.65%  | 10.40%    |
|              | LINEs                  | 19.38%  | 18.92%    |
|              | LTR elements           | 5.41%   | 5.11%     |
|              | DNA elements           | 3.01%   | 2.86%     |
|              | Other                  | 0.18%   | 0.19%     |

**table S16. Tandem repeat annotation for the jaguar genome.**

| Category                | Contigs | Scaffolds |
|-------------------------|---------|-----------|
| All TRs                 | 854704  | 856590    |
| Microsatellites         | 344251  | 343205    |
| Perfect microsatellites | 145457  | 144563    |
| Complex TRs             | 3097    | 3091      |
| Large TRs >1 kbp        | 590     | 1685      |
| Large TRs >3 kbp        | 76      | 341       |
| Large TRs >10 kbp       | 2       | 4         |



**table S17. Forty largest microsatellite families in the jaguar genome.**

| s        | Copy number | Total length (bp) | Imperfect (%) | Perfect (%) |
|----------|-------------|-------------------|---------------|-------------|
| (AG)n    | 114588      | 5367594           | 68.72         | 31.28       |
| (AC)n    | 95656       | 3857060           | 37.9          | 62.1        |
| (A)n     | 27547       | 1017208           | 40.77         | 59.23       |
| (AT)n    | 18112       | 1422474           | 78.57         | 21.43       |
| (AAAT)n  | 17070       | 735046            | 58.6          | 41.4        |
| (AAAG)n  | 14927       | 1285059           | 81.18         | 18.82       |
| (AAGG)n  | 7867        | 812581            | 86.18         | 13.82       |
| (AAAAC)n | 7663        | 284497            | 52.72         | 47.28       |
| (AAAC)n  | 6572        | 228002            | 52.77         | 47.23       |
| (AAAAT)n | 6226        | 331755            | 71.86         | 28.14       |
| (AGAT)n  | 5991        | 442948            | 80.3          | 19.7        |
| (AAT)n   | 4971        | 187591            | 54.09         | 45.91       |
| (AATG)n  | 4706        | 173181            | 57.65         | 42.35       |
| (AAC)n   | 4445        | 159310            | 46.19         | 53.81       |
| (ATCC)n  | 3084        | 411443            | 83.82         | 16.18       |
| (C)n     | 3011        | 111414            | 40.42         | 59.58       |
| (AAAAG)n | 2914        | 226321            | 86.51         | 13.49       |
| (AAG)n   | 2538        | 174700            | 60.44         | 39.56       |
| (ACAT)n  | 2512        | 116237            | 68.39         | 31.61       |
| (AGG)n   | 2252        | 154900            | 79.97         | 20.03       |
| (ATC)n   | 1498        | 78208             | 56.81         | 43.19       |
| (AGGG)n  | 1385        | 103320            | 89.39         | 10.61       |
| (AAAGG)n | 795         | 80569             | 82.77         | 17.23       |
| (ACAG)n  | 698         | 26012             | 84.1          | 15.9        |
| (AATAT)n | 602         | 38234             | 80.4          | 19.6        |
| (AAGGG)n | 564         | 44792             | 80.14         | 19.86       |
| (AATT)n  | 525         | 16903             | 38.86         | 61.14       |
| (AAATT)n | 494         | 22558             | 61.34         | 38.66       |
| (AATC)n  | 486         | 14553             | 33.54         | 66.46       |
| (AGC)n   | 453         | 19032             | 43.05         | 56.95       |
| (ACC)n   | 441         | 24983             | 51.47         | 48.53       |
| (AAGAG)n | 408         | 37429             | 82.35         | 17.65       |
| (CCG)n   | 380         | 14521             | 70.53         | 29.47       |
| (AGAGG)n | 324         | 22916             | 78.4          | 21.6        |
| (AATAG)n | 317         | 19019             | 64.67         | 35.33       |
| (AGGGG)n | 315         | 17641             | 76.83         | 23.17       |
| (AACC)n  | 297         | 12244             | 61.62         | 38.38       |
| (AAATG)n | 268         | 15104             | 67.54         | 32.46       |
| (ACTC)n  | 192         | 9116              | 69.79         | 30.21       |
| (ACCT)n  | 178         | 7407              | 76.97         | 23.03       |

**table S18. Statistics on noncoding RNA annotation in the jaguar genome.**

| Type    | Subtype         | Copy Number | Total length (bp) |
|---------|-----------------|-------------|-------------------|
| miRNA   |                 | 1,626       | 130,589           |
| tRNA    | All             | 169,838     | 4,257,400         |
|         | Without repeats | 3,299       | 313,405           |
| rRNA    | rRNA            | 510         | 94,238            |
| snRNA   | snRNA           | 3454        | 419,792           |
|         | snoRNA          | 973         | 106,012           |
| miscRNA |                 | 1640        | 323,969           |

**table S20. Previously reported genomic resources used in our multispecies analyses.**

| Common name  | Scientific Name        | Type of Data         | Accession Number |
|--------------|------------------------|----------------------|------------------|
| Tiger        | <i>Panthera tigris</i> | High-coverage genome | ATCQ01           |
| Lion         | <i>Panthera leo</i>    | Low-coverage genome  | SRX273034        |
|              |                        | (raw reads)          |                  |
| Snow Leopard | <i>Panthera uncia</i>  | Low-coverage genome  | SRX273036        |
|              |                        | (raw reads)          |                  |
| Cat          | <i>Felis catus</i>     | High-coverage genome | AANG03           |

**table S21. Consensus genome information (using the tiger assembly as a reference).**

| Feature                             | <i>Panthera leo</i> | <i>Panthera pardus</i> | <i>Panthera uncia</i> |
|-------------------------------------|---------------------|------------------------|-----------------------|
| Number of contigs                   | 1,379               | 1,375                  | 1,379                 |
| Number of bases in all contigs      | 2,390,883,613       | 2,390,829,645          | 2,390,861,245         |
| N50                                 | 8,860,407           | 8,860,407              | 8,860,407             |
| Longest contig                      | 41,607,841          | 41,607,841             | 41,607,841            |
| Median contig size                  | 15,815              | 16,235                 | 16,148                |
| Number of contigs > 100 b           | 1,376               | 1,372                  | 1,374                 |
| Total of bases into contigs > 100 b | 2,390,883,383       | 2,390,829,405          | 2,390,860,856         |
| % contigs > 100 b                   | 99                  | 99                     | 99                    |
| Number of contigs > 200 b           | 1,348               | 1,354                  | 1,351                 |
| Total of bases into contigs > 200 b | 2,390,878,923       | 2,390,826,466          | 2,390,856,977         |
| % contigs > 200 b                   | 97                  | 98                     | 98                    |
| Number of contigs > 500 b           | 1,191               | 1,187                  | 1,187                 |
| Total of bases into contigs > 500 b | 2,390,822,375       | 2,390,766,351          | 2,390,797,568         |
| % contigs > 500 b                   | 86                  | 86                     | 86                    |
| Number of contigs > 1 kb            | 962                 | 961                    | 962                   |
| Total of bases into contigs > 1 kb  | 2,390,656,905       | 2,390,603,429          | 2,390,635,250         |
| % contigs > 1 kb                    | 69                  | 69                     | 69                    |

**table S27. Detailed information on the samples used in the exome capture experiment.** Sample identification, geographic location, assigned population, collectors and mean depth

| Sample ID | Municipality    | State              | Biome/Region   | Collector        | Sequencing Depth |
|-----------|-----------------|--------------------|----------------|------------------|------------------|
| bPon-167  | Tefé            | Amazonas           | Amazon         | Emiliano Ramalho | 5.57             |
| bPon-354  | Caseara         | Tocantins          | Amazon         | Leandro Silveira | 7.01             |
| bPon-404  | Uarini          | Amazonas           | Amazon         | Emiliano Ramalho | 9.46             |
| bPon-403  | Uarini          | Amazonas           | Amazon         | Emiliano Ramalho | 9.56             |
| bPon-402  | Uarini          | Amazonas           | Amazon         | Emiliano Ramalho | 10.32            |
| bPon-401  | Uarini          | Amazonas           | Amazon         | Emiliano Ramalho | 10.53            |
| bPon-353  | Caseara         | Tocantins          | Amazon         | Leandro Silveira | 14.71            |
| bPon-338  | Chapadão do Céu | Goiás              | Cerrado        | Leandro Silveira | 9.03             |
| bPon-148  | Corumbá         | Mato Grosso do Sul | North Pantanal | Fernando Azevedo | 8.61             |
| bPon-144  | Corumbá         | Mato Grosso do Sul | North Pantanal | Fernando Azevedo | 8.71             |
| bPon-170  | Corumbá         | Mato Grosso do Sul | North Pantanal | Fernando Azevedo | 10.53            |
| bPon-171  | Corumbá         | Mato Grosso do Sul | North Pantanal | Fernando Azevedo | 12.67            |
| bPon-465  | Cáceres         | Mato Grosso        | North Pantanal | Daniel Kantek    | 13.48            |
| bPon-428  | Cáceres         | Mato Grosso        | North Pantanal | Daniel Kantek    | 13.86            |
| bPon-412  | Cáceres         | Mato Grosso        | North Pantanal | Daniel Kantek    | 15.84            |
| bPon-463  | Cáceres         | Mato Grosso        | North Pantanal | Daniel Kantek    | 16.09            |
| bPon-423  | Cáceres         | Mato Grosso        | North Pantanal | Daniel Kantek    | 17.9             |
| bPon-076  | Miranda         | Mato Grosso do Sul | South Pantanal | Fernando Azevedo | 4.6              |
| bPon-069  | Miranda         | Mato Grosso do Sul | South Pantanal | Fernando Azevedo | 4.61             |
| bPon-068  | Miranda         | Mato Grosso do Sul | South Pantanal | Fernando Azevedo | 5.91             |
| bPon-340  | Miranda         | Mato Grosso do Sul | South Pantanal | Leandro Silveira | 8.32             |
| bPon-163  | Miranda         | Mato Grosso do Sul | South Pantanal | Leandro Silveira | 9.25             |
| bPon-333  | Miranda         | Mato Grosso do Sul | South Pantanal | Leandro Silveira | 9.74             |
| bPon-339  | Miranda         | Mato Grosso do Sul | South Pantanal | Leandro Silveira | 9.77             |
| bPon-343  | Miranda         | Mato Grosso do Sul | South Pantanal | Leandro Silveira | 9.89             |
| bPon-074  | Miranda         | Mato Grosso do Sul | South Pantanal | Fernando Azevedo | 10.64            |
| bPon-350  | Miranda         | Mato Grosso do Sul | South Pantanal | Leandro Silveira | 10.93            |
| bPon-344  | Miranda         | Mato Grosso do Sul | South Pantanal | Leandro Silveira | 11.02            |
| bPon-071  | Miranda         | Mato Grosso do Sul | South Pantanal | Fernando Azevedo | 12.73            |
| bPon-342  | Miranda         | Mato Grosso do Sul | South Pantanal | Leandro Silveira | 13.19            |

**table S28. Enrichment results for the jaguar branch-site test.** Analysis refers to the analysis performed in WebGestalt with a significance threshold of  $\alpha < 0.05$  and a correction for multiple comparisons. Characteristic refers to the enriched category found. Parameters describes enrichment details. C (Genes presented in the category); O (Genes observed in the dataset); R (Ratio of enrichment); rawP (p-value for the hypergeometric test); adjP (adjusted P value by the multiple correction test).

| Database | Category               | Parameters                                           | Genes                                        |
|----------|------------------------|------------------------------------------------------|----------------------------------------------|
| Disease  | Hyperpituitarism       | C=26;O=2;E=0.01;R=174.60;rawP=5.94e-05;adjP=7.92e-05 | <i>SSTR4</i> ; <i>ESRP1</i>                  |
|          | Adenoma                | C=157;O=3;E=0.07;R=43.37;rawP=4.39e-05;adjP=7.92e-05 | <i>SLC26A3</i> ; <i>SSTR4</i> ; <i>ESRP1</i> |
|          | Acromegaly             | C=20;O=2;E=0.01;R=226.98;rawP=3.48e-05;adjP=7.92e-05 | <i>SSTR4</i> ; <i>ESRP1</i>                  |
|          | Brenner tumor of ovary | C=222;O=2;E=0.10;R=20.45;rawP=0.0043;adjP=0.0043     | <i>CNTNAP1</i> ; <i>FOXJ2</i>                |
| KEGG     | Pathways in cancer     | C=326;O=2;E=0.20;R=10.18;rawP=0.0164;adjP=0.0164     | <i>TPM3</i> ; <i>BIRC2</i>                   |

**table S29. Enrichment results for the lion branch-site test.** Analysis refers to the analysis performed in WebGestalt with a significance threshold  $< 0.05$  and multiple correct testing (FDR). Characteristic refers to the enriched category found. Parameters describes enrichment details. C (Genes presented in the category); O (Genes observed in the dataset); R (Ratio of enrichment); rawP (p-value for the hypergeometric test); adjP (adjusted P value by the multiple correction test).

| Category           | Gene Ontology                      | Parameters                                       | Genes        |
|--------------------|------------------------------------|--------------------------------------------------|--------------|
| Molecular Function | Structural Molecule Activity       | C=621;O=2;E=0.12;R=16.41;rawP=0.0048;adjP=0.0096 | KRT40; KRT76 |
|                    | Intermediate Filament Cytoskeleton | C=230;O=2;E=0.04;R=49.43;rawP=0.0005;adjP=0.0043 | KRT40; KRT76 |
| Cellular Component | Intermediate Filament              | C=190;O=2;E=0.03;R=59.84;rawP=0.0004;adjP=0.0043 | KRT40; KRT76 |
